# Supplementary material for: A cathepsin F-like peptidase involved in barley grain protein mobilization, HvPap-1, is modulated by its own propeptide and by cystatins
Source: PubMed Central journal article supplement — J Exp Bot. 2012 Jul 20;63(12):4615–29. doi: 10.1093/jxb/ers137 (PMC3421991; doi:10.1093/jxb/ers137), 2012-07-20
Supplement: supp_ers137_00079202-file001.pdf [file supp_ers137_00079202-file001.pdf]

**A cathepsin F-like peptidase involved in barley grain protein mobilization, HvPap-1, is modulated by its own propeptide and by cystatins**

Ines Cambra, Manuel Martinez, <sup>a</sup>Beatriz Dáder, Pablo González-Melendi, Jacinto Gandullo  
<sup>b</sup>M. Estrella Santamaría, \*Isabel Diaz

Centro de Biotecnología y Genómica de Plantas (UPM-INIA). Campus Montegancedo  
Universidad Politécnica de Madrid. Autovía M40 (Km 38), 28223-Pozuelo de Alarcón,  
Madrid, Spain.

<sup>a</sup>Instituto de Ciencias Agrarias-CSIC. Calle Serrano 115bis, 28006 Madrid, Spain

<sup>b</sup>Department of Biology WSC 339/341 The University of Western Ontario 1151 Richmond  
St London, Ontario, N6A 5B7 Canada.

Figure S1. Comparison of the amino acid sequences of the cathepsin-F like cysteine proteases used in the phylogenetic tree. The alignment was generated using the MUSCLE program. The specific ERFNAQ motif for cathepsin-F like proteases is marked. At, *Arabidopsis thaliana*; Pt, *Populus trichocarpa*; Rc, *Ricinus communis*; Os, *Oryza sativa*; Sb, *Sorghum bicolor*; Bd, *Brachypodium distachyon*; Hv, *Hordeum vulgare*; Sm, *Selaginella moellendorffii*.

```

SbPap-3      -----MASQLAVLLI LLLPLAGA-----STDDGF---IRQVTDGR-RSPAGAG
BdPap-3      -----MTARLLLLL LALVYATFFR--AAAGASGDDV---IRQVTDNGAFAARRFP
OsPap-22     -----MAAAPARLVVL VLVAVVV---VVGDDGDAGV---IRQVTDGGYWP-----
HvPap-3      -----MAARLVSL LLL LALVWVA--HGAGVSAEDV---IRQVTDSGHGAGH---
AtPap-26     MVA-----KALAQLITCI I L FCHVVA-----SVEDLT---IRQVTADNRRIAPNL-
PtPap-25     -----MKNGL-----
RcPap-3      MIQERPTALIFTVI PLAILAFTTLT LTT SATSGDATLQDPT---ILQVTD D P S V T L S N R K
SmPap-8      -----MSSSVVDN-GDRS-----
SbPap-2      -----MARLLLLLLAFLFSTAALCSPDASAAEDPL---IEQVVGGA-GDDE---
BdPap-1      --MDH-----RLVAPL L L L L V G L L L S P A A --ATATAGDEDPL---IRQVVGGA-DPLD---
HvPap-1      --MDH-----RLVAPL L L L L V G L L L S P A P --ATAAGDEEPL---IRQVVGGA-DPLD---
SbPap-1      -----MAHRV L L L L S L A A W A V A -----AAVDTE D P L ---IRQV V P G G - D D N E ---
OsPap-41     -----MDH R L L L L G L L L S P A V A --AASVFGEEEP L ---IRQV V G G G - D D N E ---
OsPap-17     --MARHR--RLAAAA L L L L L S S A A L S S S A E G E E D P L ---IEQV V G G G - E E E D ---
BdPap-2      --MARL-----RRLPIVVAAV L L L S G V A A -----LSSPVEDPL---IEQV V G G D - E K N E ---
HvPap-2      --MARLRLRL R L L L L V A A V L L L H H P A L --S S A T E G L E D P L ---IEQV V G G D - A E N E ---
AtPap25      -----MD---RVVFFFLIAAT L L A G S L G - S T V I S G E V T D G F V N P I R Q V V P E E - N D E ---
AtPap-24     MDYHL-----RVLFSVSL I F V F V S V S V C -----GDEDVL---IRQVVD E T - E P -----
AtPap-23     --MDRL-----KLYFSV F V L S F F I V S V S S ---SDVMDGDDLV---IRQV V G G A - E P -----
RcPap-1      MVMAV-----RPSFFV I S S I L F V S A V T A --E T L T T D G E D P L ---IRQV T D G Q D E S S A N P -
PtPap-15     --MSL-----NLSL L V I L S L L F T S A V H A -----ETLNGDDPL---IREVVDGQDASSS---
PtPap-14     --MSL-----NLSL F L I L S L F F I S A I S A -----E T F N G D D S L ---IRQV V E G Q D E S S S ---
RcPap-2      --ME-----RSCFLS L I V E A F L S S S I L - F T A T S D E L D D P L ---IRQV V P D V - E D -----
PtPap-21     --ME-----RLP L L F L L L L T A L S S T L A - S T V S S D L D D P L ---IRQV V S E G - E D -----
PtPap-17     --ME-----RPSL L A L L L L L T L L C S A V A - S T V S S N D L D D P L ---IRQV V S D G - E D -----

```

```

SbPap-3      ALG L L P E - A Q F A A F V R R H G R R Y S - G P E E Y A R R L R V F T A N L A R L A A H Q A L D P T A R H G V T P F
BdPap-3      S P G L L P E - A K F A A F V R R H G K E Y S G G A E E Y A R R L R V F T A N L A R L A A H Q A L D P G A R H G V T P F
OsPap-22     - P G L L P E - A Q F A A F V R R H G R E Y S - G P E E Y A R R L R V F T A N L A R L A A H Q A L D P T A R H G V T P F
HvPap-3      - P G L L P E - A Q F A A F V R R H G K E Y S - G P E E Y A R R L R V F T A N V A R L A A H Q A L D P G A R H G V T P F
AtPap-26     - L G T H T E - S K F R L F M S D Y G K N Y S - T R E E Y I H R L G I F A K N V L K A A E H Q A L D P S A V H G V T Q F
PtPap-25     - N L L G T E - E K F K M F I K E H N K E Y A - T R E E Y V H R F G I F G K N L I R A V E H Q A L D P T A I H G V T P F
RcPap-3      F L G T N T E - E N F K M F M I K Y D K E Y D - T R E E Y M H R L G V F K N L I R A A E H Q A L D P T A V H G I T P F
SmPap-8      - A L L D V E - T H F K S F I A R F G K A Y A - T A E E H A H R L K V F T A N L V R A V S H Q A L D P S A V H G I T Q F
SbPap-2      - L E L N A E - A H F A S F V R R F G K T Y R - D A E E H A H R L S V F T A N L R R A A R R H Q A L D P T A V H G V T K F
BdPap-1      - N D L E L S - S H F T S F V Q R F G K T Y K - D A E E H A H R L S V F T A N L R R A A R R H Q A L D P S A E H G I T K F
HvPap-1      - N D L E L D - S Q F V G F V Q R F G K T Y R - D A E E H A H R L S V F T A N L R R A A R R H Q A L D P S A E H G V T K F
SbPap-1      - L E L N A E - S H F L S F V Q R F G K S Y K - D A E E H A Y R L S I F T A N L R R A A R R H Q A L D P S A E H G V T K F
OsPap-41     - L E L N A E - R H F A S F V Q R F G K S Y R - D A E E H A Y R L S V F T A N L R R A A R R H Q A L D P S A E H G V T K F
OsPap-17     - A Q L D A E - A H F A S F E R R F G R T Y R - D A G E R A Y R M S V F T A N L R R A A R R H Q A L D P T A T H G V T K F
BdPap-2      - L E L N A E - A H F A S F V Q R F N K S Y R - D A D E H A H R L S V F T A N L R R A A R R H Q A L D P S A V H G V T K F
HvPap-2      - L E L N A E - A H F A S F V R R F G K S Y R - D A D E H E H R L S V F T A N L R R A A R R H Q A L D P S A V H G I T K F
AtPap25     - Q L L N A E - H H F T L F K S K Y E K T Y A - T Q V E H D Y R F R V F T A N L R R A A R R M Q A L D P S A V H G V T Q F
AtPap-24     - K V L S S E - D H F T L F G K K F G K V Y G - S I E E H Y Y R F S V F T A N L L R A A R R H Q A L D P S A R H G V T Q F
AtPap-23     - Q V L T S E - D H F S L F K R K F G K V Y A - S N E E H D Y R F S V F T A N L R R A A R R H Q A L D P S A T H G V T Q F
RcPap-1      - N L L G A E - H H F S L F Y G K K F K T Y A - S Q E E H D Y R F K I F T A N L R R A A R R H Q A L D P T A T H G V T Q F
PtPap-15     - N L L S A E Q H H F S L F K S K F K S Y G - S Q E E H D Y R F S V F T A N L R R A A R R H Q A L D P T A S H G V T Q F
PtPap-14     - N L L T A E Q H H F S L F K R K F K S Y L - S Q E E H D Y R F S V F T A N L R R A A R R H Q A L D P T A S H G V T Q F
RcPap-2      - Y L L S A Q - H H F T A F K A K F G K N Y A - T Q E E H D Y R F K V F T A N L R R A A R R H Q A L D P S A V H G V T K F
PtPap-21     - H L L N A E - H H F T T F K S K F G K N Y A - T Q E E H D Y R F S V F T A N L L R A A R R H Q A L D P T A A H G V T K F
PtPap-17     - D L L N A E - H H F T S F K S K F G K T Y A - T Q E E H D Y R F G V F T A N L R R A A R R H Q A L D P T A A H G I T K F

```

```

SbPap-3      S D L T R E E F E A R L T G V - R A G A G G D V Q R L -----V M S G A P A A P P A S Q E E V S R L P A S F D W R D

```

BdPap-3 SDLTPEEFQARLTGLQQQ-----GTNN-----NMPAAARATAEELATLPASFDWRA  
OsPap-22 SDLTREEFEARLTGL-AADVGGDDVRRR-----PMPAAAPATEEEVSGLPASFDWRD  
HvPap-3 SDLTREEFEARLTGL-VG-----AGDV-----LRSARMPAAAPATEEEVAALPASFDWRD  
AtPap-26 SDLTEEFKRMVYTGADV-----GSSR-----GGTVGAEAPMVEVDGLPEDFDWRE  
PtPap-25 MDLTEEFERMYAGV-LG-----GGTV-----PVEK-GSVSFMDSAGLPDSFDWRE  
RcPap-3 MDLTEEFERMYTGV-VG-----GGAV-----GAEVGTATSFLETAGLPSSFDWRK  
SmPap-8 SDLTEEFKQQFLGL-RV-----PSRL-----REA-NKAPVLPDNDLPEDFDWRE  
SbPap-2 SDLTPAEFRRTQFLGL-RR-----SRSSGQDLLKG--SGSA-HEAPVLPDGLPTDFDWRE  
BdPap-1 SDLTPAEFRRTFLGL-KT-----SRRS---FLREI-GGSA-HDAPVLPDGLPDDFDWRD  
HvPap-1 SDLTPAEFRRTYLGL-KT-----TRRS---FLREM-AGSA-HDAPVLPDGLPEDFDWRD  
SbPap-1 SDLTPAEFRRTYLGL-RK-----SRRS---LLREL-GKSA-NEAPVLPDGLPDDFDWRD  
OsPap-41 SDLTPAEFRRAYLGL-RT-----SRRS---FLRGL-GGSA-HEAPVLPDGLPDDFDWRD  
OsPap-17 SDLTPGEFRDRFLGL-----RRP---SLEGLVGGEP-HEAPVLPDGLPDDFDWRE  
BdPap-2 SDLTPDEFDRFLGL-RK-----YRRS---FLKGL-SGSA-HDAPALPTDGLPTEFDWRE  
HvPap-2 SDLTPDEFRRFLGL-RK-----SRRS---FLKGI-SGSA-HDAPALPTDGLPTEFDWRE  
AtPap25 SDLTPKEFRKFLGLKRR-----GFRL-----PTDT-QTAPILPTSDLPTEFDWRE  
AtPap-24 SDLTRSEFRKHLGV-KG-----GFKL-----PKDA-NQAPILPTQNLPEFDWRD  
AtPap-23 SDLTRSEFRKHLGV-RS-----GFKL-----PKDA-NKAPILPTENLPEDFDWRD  
RcPap-1 SDLTHSEFRRQFLGL-RR-----LRL-----PKDA-NEAPMLPTNDLPADFDWRE  
PtPap-15 SDLTPAEFRKQVLGL-RR-----LRL-----PKDA-NEAPILPTSDLPEDFDWRD  
PtPap-14 SDLTPAEFRKQVLGL-RK-----LRL-----PKDA-NTAPILPTNDLPEDFDWRE  
RcPap-2 SDLTPREFRRQYLGL-KK-----LRL-----PADA-HEAPVLPDGLPEDFDWRD  
PtPap-21 SDLTPKEFRQLLGL-KR-----RLRL-----PTDA-NKAPILPTGDLPTDFDWRD  
PtPap-17 SDLTPKEFRRQFLGL-KR-----WLRL-----PTDA-NKAPILPTDLPDPTDWRD  
\*\*\* \*\* \*; . . :\* .:\*\*\*

SbPap-3 KGAVTVKMQGACGSCWAFSTTGAVEGANFLATGKLLLELSEQQLVDCDHTCSAVAQNECN  
BdPap-3 KGAVTEVKMQGACGSCWAFSTTGAVEGAHFVATGKLLNLSEQQLVDCDHTCDAVAKNECD  
OsPap-22 RGAVTDVKMQGACGSCWAFSTTGAVEGANFLATGNLLDLSEQQLVDCDHTCDAEAKTECD  
HvPap-3 KGAVTDVKMQGACGSCWAFSTTGAVEGANFVATGKLLDLSEQQLVDCDHTCDAVAKTECN  
AtPap-26 KGGVTEVKMQGACGSCWAFSTTGAVEGAHFVSTGKLLSLSEQQLVDCDQACDFKDKKACD  
PtPap-25 KGAVTDVKIQGSCGSCWAFSTTGAVEGANFIATGKLLNLSEQQLVDCDRVCDKTKASC  
RcPap-3 KGAVTDVKMQGACGSCWAFSTTGAVEGANFIATGKLLNLSEQQLVDCDRVCDIKEKTACD  
SmPap-8 HGAVTEVKMQGACGSCWAFSTTGAVEGAHFLETGKLLSLSEQQLVDCDHSCTDVKVSCD  
SbPap-2 HGAVGPVKDQGSCGSCWAFSTGSAIEXXXXXXXXXXXXXXXXXXXXXXXXXXCDPSEPRSCD  
BdPap-1 HGAVGPVKDQGSCGSCWAFSTGSAIEXXXXXXXXXXXXXXXXXXXXXXXXXXCDPSEPRSCD  
HvPap-1 HGAVGPVKDQGSCGSCWAFSTGSAIEXXXXXXXXXXXXXXXXXXXXXXXXXXCDPSEPRSCD  
SbPap-1 HGAVTPVKDQGSCGSCWAFSTGSAIEXXXXXXXXXXXXXXXXXXXXXXXXXXCDPSEPRSCD  
OsPap-41 HGAVGPVKDQGSCGSCWAFSTGSAIEXXXXXXXXXXXXXXXXXXXXXXXXXXCDPSEPRSCD  
OsPap-17 HGAVGPVKDQGSCGSCWAFSTGSAIEXXXXXXXXXXXXXXXXXXXXXXXXXXCDPSEPRSCD  
BdPap-2 HGAVGPVKDQGSCGSCWAFSTGSAIEXXXXXXXXXXXXXXXXXXXXXXXXXXCDPSEPRSCD  
HvPap-2 HGAVGPVKDQGSCGSCWAFSTGSAIEXXXXXXXXXXXXXXXXXXXXXXXXXXCDPSEPRSCD  
AtPap25 QGAVTPVKDQGSCGSCWAFSTGSAIEXXXXXXXXXXXXXXXXXXXXXXXXXXCDPSEPRSCD  
AtPap-24 RGAVTPVKDQGSCGSCWAFSTGSAIEXXXXXXXXXXXXXXXXXXXXXXXXXXCDPSEPRSCD  
AtPap-23 HGAVTPVKDQGSCGSCWAFSTGSAIEXXXXXXXXXXXXXXXXXXXXXXXXXXCDPSEPRSCD  
RcPap-1 KGAVTAVKMQGACGSCWAFSTTGAVEGANFLATGKLVSLSEQQLVDCDHECDPAEAGACD  
PtPap-15 KGAVGPIKMQGACGSCWAFSTTGAVEGANFLATGKLVSLSEQQLVDCDHECDPEEFGSCD  
PtPap-14 KGAVGPVKDQGSCGSCWAFSTTGAVEGANFLATGKLVSLSEQQLVDCDHECDPEEFGSCD  
RcPap-2 HGAVTAVKMQGACGSCWAFSTTGAVEGANFLATGKLVSLSEQQLVDCDHECDPEEYAGACD  
PtPap-21 HGAVTSVKDQGSCGSCWAFSTTGAVEGANFLATGKLVSLSEQQLVDCDHECDPEEYAGACD  
PtPap-17 HGAVTEVKDQGSCGSCWAFSTTGAVEGANFLATGKLVSLSEQQLVDCDHECDPEEYAGACD  
.\*.\* :\* \*\* \*\*\*\*\*; \*\*; \*; \* . \*

SbPap-3 NGCAGGLMTNAYAYLMSGGGLMEQRAYPYTGAP-GPCRFDPAKAAVRVANFTAVPA----  
BdPap-3 SGCAGGLMTNAYAYLIRAGGLMEQAAYPYTGAP-GTCRFDANKVAVRVTSFTAVFP----  
OsPap-22 SGCAGGLMTNAYAYLMSGGGLMEQSAYPYTGAP-GTCRFDANRVAVRVANFTVVAPPGN  
HvPap-3 SGCAGGLMTNAYAYLMSGGGLMEQAAYPYTGAP-GPCRFDGKAVAVRVANFTAVPL----  
AtPap-26 NGCAGGLMTNAYAYLMEAGGLEEERSYPYTGKR-GHCKFDPEKAVRVNFTTIPL----  
PtPap-25 DGCAGGLMTNAYAYLIEAGGLEESSYPYTGKS-GECKFDPEKIAVKVANFTSIAP----  
RcPap-3 DGCAGGLMTNAYAYLIEAGGLEDEISYPYTGKP-GKCKFDEKKIAVRVNFVFTSIFI----  
SmPap-8 AGCAGGLMTNAYAYLMSGGGLMEQRAYPYTGAP-GPCRFDPAKAAVRVANFTAVPA----  
SbPap-2 SGCAGGLMTTAFSYLQKVGGLEREEDYPYNGRD-STCKFDKSKIIVAVQNFVSVV----  
BdPap-1 AGCAGGLMTTAFSYLQKVGGLEREEDYPYNGRD-STCKFDKSKIIVAVQNFVSVV----  
HvPap-1 AGCAGGLMTTAFSYLQKVGGLEREEDYPYNGRD-STCKFDKSKIAASVQNFVSVV----  
SbPap-1 SGCAGGLMTTAFSYLQKVGGLEREEDYPYNGRD-STCKFDKSKIIVAVQNFVSVV----  
OsPap-41 AGCAGGLMTTAFSYLQKVGGLEREEDYPYNGRD-STCKFDKSKIIVAVQNFVSVV----  
OsPap-17 SGCAGGLMTTAFSYLQKVGGLEREEDYPYNGRD-STCKFDKSKIIVAVQNFVSVV----

BdPap-2 AGCNGGLMTTAFSYLAKAGGLETEKDYFPYTGRRG-GACKFDKSKIAAQVKNFSTVAV----  
HvPap-2 AGCNGGLMTTAFSYLAKAGGLETEKDYFPYTGRRN-SACKFDKSKIAAQVKNFSTVAI----  
AtPap25 GCCSGGLMNNAFEYALKAGGLMKEEDYFPYTGDRDHTACKFDKSKIVASVSNFVSVSS----  
AtPap-24 SGCNGGLMNSAFEYTLKAGGLMREKDYFPYTGTDGGSCKLDRSKIIVASVSNFVSVSI----  
AtPap-23 SGCNGGLMNSAFEYTLKAGGLMKEEDYFPYTGKDGKTCCKLDKSKIIVASVSNFVSVISI----  
RcPap-1 SGCNGGLMNSAFEYTLKAGGLMREEDYFPYTGTDRGACQFDKTKIAAKVANFVSVSL----  
PtPap-15 SGCNGGLMNSAFEYTLKAGGLMREEDYFPYTGTDRGACKFDKSKVAAARVANFVSVSL----  
PtPap-14 SGCNGGLMNSAFEYTLKAGGLMREEDYFPYTGMDRGACKFDKSKVAAAGVANFSAVSL----  
RcPap-2 SGCNGGLMNTNAFEYILKAGGLEREEDYFPYTGSDRGPKFERAKIAASVMNFVSVSV----  
PtPap-21 GCCSGGLMNNAFEYALKAGGLEREKDYFPYTGMDRGACKFEKSKVAAASVSNFVSVSL----  
PtPap-17 GCCDGLMNNAFEYALKAGGLEREADYFPYTGTDGGTCKFDKSKVVASVSNFVSVSI----  
\*\* \*\*\*\*\*: \* \*\*\* : \*\*\* \* \*.: : . . . \* .: : .

SbPap-3 --GDEAQIRAAALVRRGPLAVGLNAAFMQTYVGGVSCPLLCPRAMVNHGV---LLVGYGAR  
BdPap-3 --DDEDQIRASLVRAGPLAVGLNAAFMQTYLGGVSCPLLCPRKLI NHGV---LLVGYGAR  
OsPap-22 DGDGDAQMRAALVRHGPLAVGLNAAFMQTYVGGVSCPLVCPRAWVNHGV---LLVGYGER  
HvPap-3 ---DEDQMRAALVRRGPLAVGLNAAFMQTYVGGVSCPLICPRAMVNHGV---LLVGYGAR  
AtPap-26 ---DENQIAANLVRHGPLAVGLNAVFMQTYIGGVSCPLICSKRWVNHGV---LLVGYGSK  
PtPap-25 ---DENQIAANLVHGGPLAIGLNAIFMQTYIGGVSCPLICGKRWVNHGV---LLVGYGAR  
RcPap-3 ---DENQIAAHLVHGGPLAIGLNAVFMQTYIGGVSCPLICGKRWVNHGV---LLVGYGAK  
SmPap-8 ---DEDQIAANLVKHGPLAIGINAVFMQTYIGGVSCPIICSKHHI DHGV---LLVGYGAK  
SbPap-2 ---NEDQIAANLVKHGPLAIGINAVFMQTYIGGVSCPYICGRH-LDHGV---LLVGYGSA  
BdPap-1 ---DEEQIAANLVKHGPLAIGINAAFMQTYIGGVSCPYICGRS-LDHGV---LLVGYGAS  
HvPap-1 ---DEEQIAANLVKYGPLAIGINAAFMQTYIGGVSCPYICGRH-LDHGV---LLVGYGAS  
SbPap-1 ---DEGQIAANLIKHGPLAIGINAAFMQTYIGGVSCPYICGRT-LDHGV---LLVGYGAA  
OsPap-41 ---DEDQIAANLVKHGPLAIGINAAFMQTYIGGVSCPYICGRH-LDHGV---LLVGYGAS  
OsPap-17 ---NEDQIAANLVKHGPLAIGAINAAFMQTYIGGVSCPFICGRH-LDHGV---LLVGYGSA  
BdPap-2 ---DEDQIAANLVKHGPLAIGINAVFMQTYIGGVSCPFICGRH-LDHGV---LLVGYGSA  
HvPap-2 ---DEDQIAANLVKHGPLAIGINAVFMQTYIGGVSCPYICGRH-LDHGVPGWLMI SWLRT  
AtPap25 ---DEDQIAANLVQHGPLAIGAINAMMMQTYIGGVSCPYVCSKS-QDHGV---LLVGFSS  
AtPap-24 ---NEDQIAANLIKNGPLAVAINAAFMQTYIGGVSCPYICSRRLNHGV---LLVGYGSA  
AtPap-23 ---DEEQIAANLVKNGPLAVAINAGFMQTYIGGVSCPYICTRR-LNHGV---LLVGYGAA  
RcPap-1 ---DEDQIAANLVKNGPLAVAINAVFMQTYIGGVSCPYICSKR-LDHGV---LLVGYGSA  
PtPap-15 ---DEDQIAANLVKNGPLAVAINAVFMQTYIGGVSCPYICSRRLDHGV---LLVGYGSA  
PtPap-14 ---DEDQIAANLVKNGPLAVAINAVFMQTYIGGVSCPYICSRRLDHGV---LLVGYGSA  
RcPap-2 ---DEDQIAANLVQNGPLAVGINAVFMQTYIGGVSCPYICSKR-QDHGV---VLVGYGSA  
PtPap-21 ---DEDQIAANLVKHGPLSVAINAVFMQTYIGGVSCPYICSKH-QDHGV---LLVGYGAA  
PtPap-17 ---DEDQIAANLVKHGPLSVAINAAFMQTYVGGVSCPYICSKR-QDHGV---LLVGYGSA  
.: \*: \* \*.: \*\*\*\*\*:\*\*\*\*\* :\* . :\*\*\* : ::

SbPap-3 GFPAALRLGYRFPYWI IKNSWGERWGEQGYRRLCRG---SNVCGVDSMVSAVAVAPVP----  
BdPap-3 GLAPLRLGYRFPYWI IKNSWGEKWEQGYRRLCRGARNRNVCGVDSMVSAVAVAL-----  
OsPap-22 GFPAALRLGHRFPYWI IKNSWGWKWEQGYRRLCRG---RNVCGVDTMVSAVAVAPPPP---  
HvPap-3 GFSALRLGYRFPYWI IKNSWGAQWGEQGYRRLCRG---RNVCGVDSMVSAVAVAP-----  
AtPap-26 GFSILRLSNKFPYWI IKNSWGGKWEQGYRRLCRG---HDICGINSMVSAVATQVSS-----  
PtPap-25 GYSILRFGYKFPYWI IKNSWGNHWGEQGYRRLCRG---HGMCGMDSMVSAVVTKVA-----  
RcPap-3 GFSILRLGYKFPYWI IKNSWGGKWEQGYRRLCRG---YGMCGMDRMVSAVVTQVS-----  
SmPap-8 GYAPIRFTEKFPYWI IKNSWGATWGEQGYRRLCRG---HGMCGMNTMVSTVA-----  
SbPap-2 GYAPIRFEKFPYWI IKNSWGENWGEQGYRRLCRGPHVQNKCGVDSMVSTVAIHTSSKKE--  
BdPap-1 GFAPSRLLKFPYWI IKNSWGENWGEQGYRRLCRGNSVRNCGVDSMVSTVAIAHTSKEE--  
HvPap-1 GFAPSRFTEKFPYWI IKNSWGENWGDQGYRRLCRGNSVRNCGVDSMVSTVSATHSSKEE--  
SbPap-1 GFAPIRLKDKFPYWI IKNSWGENWGEQGYRRLCRGNSVRNCGVDSMVSTVSAVRTSKE--  
OsPap-41 GFAPIRLKDKA YWI IKNSWGENWGEHGYRRLCRGNSVRNCGVDSMVSTVSAIHTSKE--  
OsPap-17 GYAPIRFTEKFPYWI IKNSWGENWGEQGYRRLCRGPHDKNCGVDSMVSSVTAIHTSKEE--  
BdPap-2 GYAPLRFTEKFPYWI IKNSWGENWGESGYRRLCRGAVHKNCGVDSMVSTVTAIHTSKEE--  
HvPap-2 --APL--QGETILDHKELMGRELGRERVLQDLQ---STCQKQVRCRFHGLHGYPHPYL  
AtPap25 GYAPIRLKEKFPYWI IKNSWGAMWGEHGYRRLCRG---HNMCGMDTMVSTVAAVTSPK---  
AtPap-24 GFSQARLKEKFPYWI IKNSWGESWGEHGYRRLCRG---RNICGVDSLSTVAAVTSS---  
AtPap-23 GYAPARFTEKFPYWI IKNSWGETWGEHGYRRLCRG---RNICGVDSMVSTVAAVTSTTAH  
RcPap-1 GYAPIRMKKFPYWI IKNSWGENWGESGYRRLCRG---RNICGVDSMVSTVAAVQTASE--  
PtPap-15 GYSPVFMKEKFPYWI IKNSWGEKWEHGYRRLCRG---RNVCGVDSMVSTVAAVQTSSQ--  
PtPap-14 AYAPVFMKEKFPYWI IKNSWGESWGEHGYRRLCRG---RNICGVDSMVSTVAAVQTNSL--  
RcPap-2 GYAPVRLKDKFPYWI IKNSWGENWGEHGYRRLCRG---RNVCGVDAMVSTVAIHTTAR--  
PtPap-21 GYAPIRFTEKFPYWI IKNSWGENWGEHGYRRLCRG---RNICGVDSMVSTVAIHTATAQ--  
PtPap-17 GYAPIRFTEKFPYWI IKNSWQNWGEHGYRRLCRG---RNICGVDSMVSTVAIHTTAAQ--  
: . \* : \* \* . . . \* :

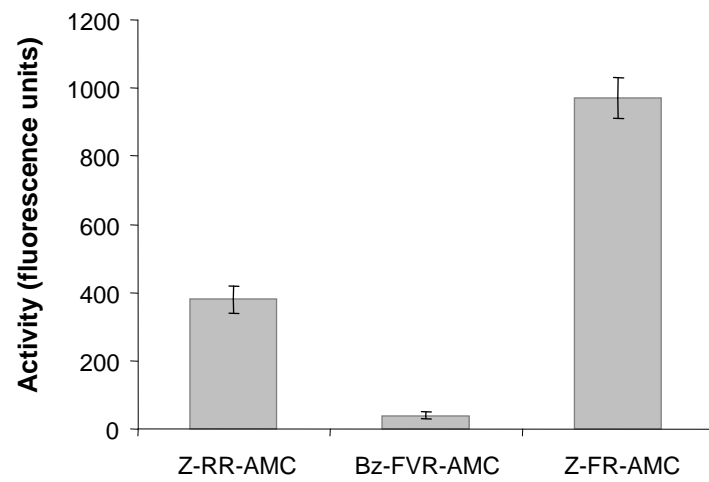

**Fig. S2.** Enzymatic activity of recombinant HvPap-1 determined using the fluorogenic substrates Z-FR-AMC, Z-RR-AMC and Bz-FVR-AMC, susceptible to degradation by cathepsin L-, B- and H-like peptidases, respectively.

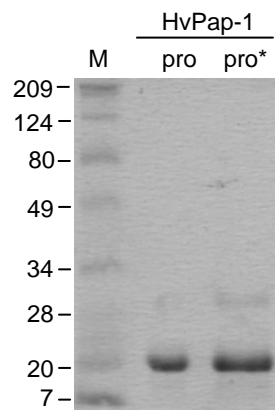

**Fig. S3.** Purification of recombinant propeptides derived from the HvPap-1 protease. SDS-PAGE of recombinant propeptides HvPap-1pro and HvPap-1pro\* purified from *E. coli* cultures. Molecular markers (M) in kDa are indicated. The gel was stained with Coomassie Brilliant Blue R-250.

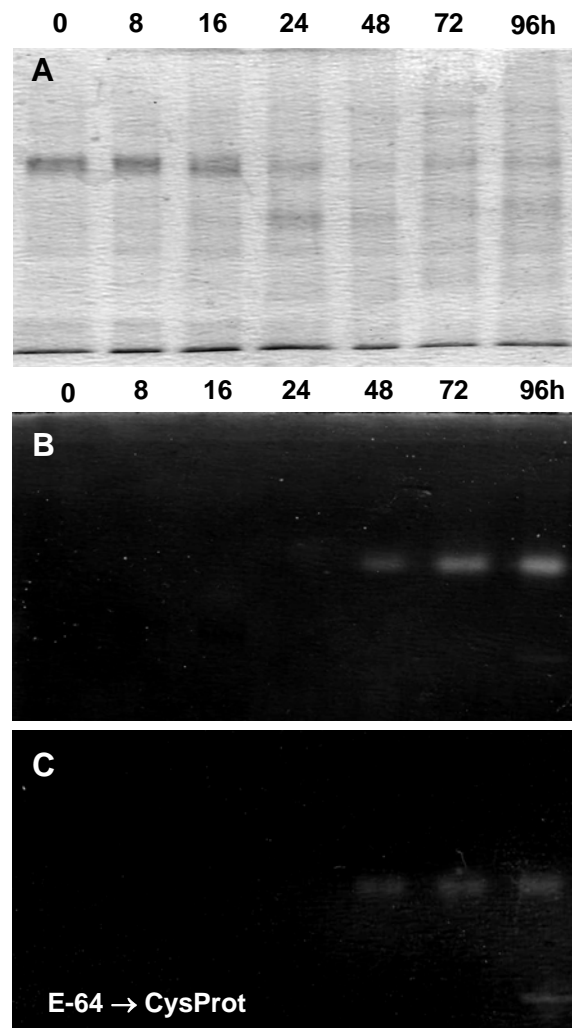

**Fig. S4.** Protein expression pattern and protease activity of embryos during germination. **A**, Protein pattern of crude extracts of embryo barley grains at different germination times (0-96h) stained with Coomassie Brilliant Blue R-250. **B-C**, Zymograms of the gelatinolytic activity of embryos isolated at different germination times (0-96h). Before electrophoresis, 2  $\mu\text{g}$  of protein samples were incubated in buffer alone or with 100  $\mu\text{M}$  E-64.

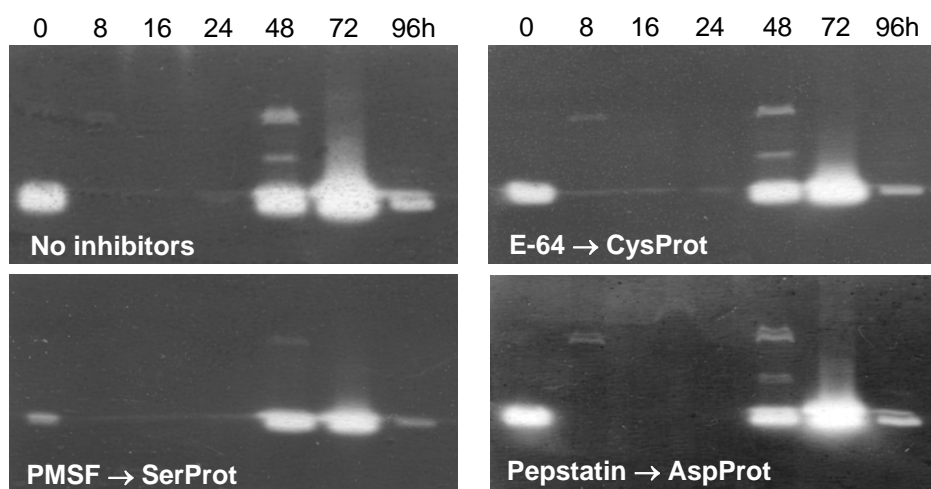

**Fig. S5.** Zymograms of the gelatinolytic activity of protein extracts from de-embryonated barley grains at different germination times (0-96 h). Before electrophoresis, samples were incubated in buffer alone, 100  $\mu$ M E-64, 250  $\mu$ M PMSF and 20  $\mu$ M pepstatin. CysProt: cysteine-proteases; SerProt: Serine-proteases; AspProt: Aspartic-proteases.



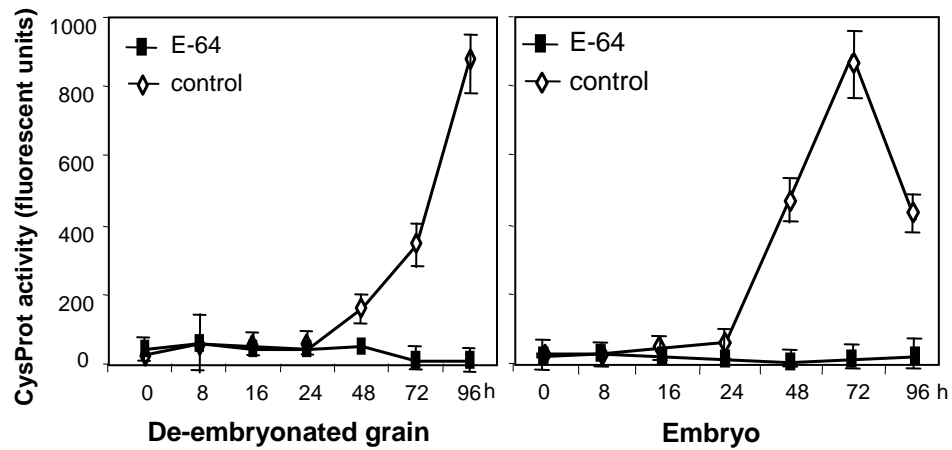

**Fig. S6.** *In vitro* quantification of CysProt activity in extracts from de-embryonated grain and embryo fractions of barley grain at different germination times. 2  $\mu$ g of protein extract were incubated in buffer alone or with 100  $\mu$ M of E-64 using Z-FR-AMC as fluorescent substrate. Proteolytic activity was expressed as fluorescent units and represents the mean  $\pm$  se of triplicate measurements.

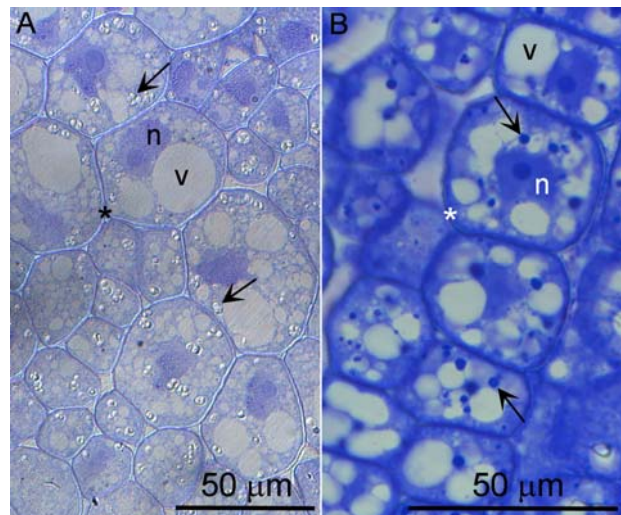

**Fig. S7. A,** Histochemical characterization of barley embryos 24 hai on 2 μm sections from formaldehyde-fixed and LRwhite-embedded specimens. Toluidine blue O staining reveals a good structural preservation. Purple nuclei (n) and a cytoplasm filled with unstained vacuoles of different sizes can be identified. DIC gives contrast to numerous small refringent structures (arrows) in the cytoplasm and the cell walls (asterisk), as well. B, Coomassie stains protein containing structures within the cell: nuclear (n) chromatin and nucleolus, cytoplasm and abundant small, round cytoplasmic structures (arrows).

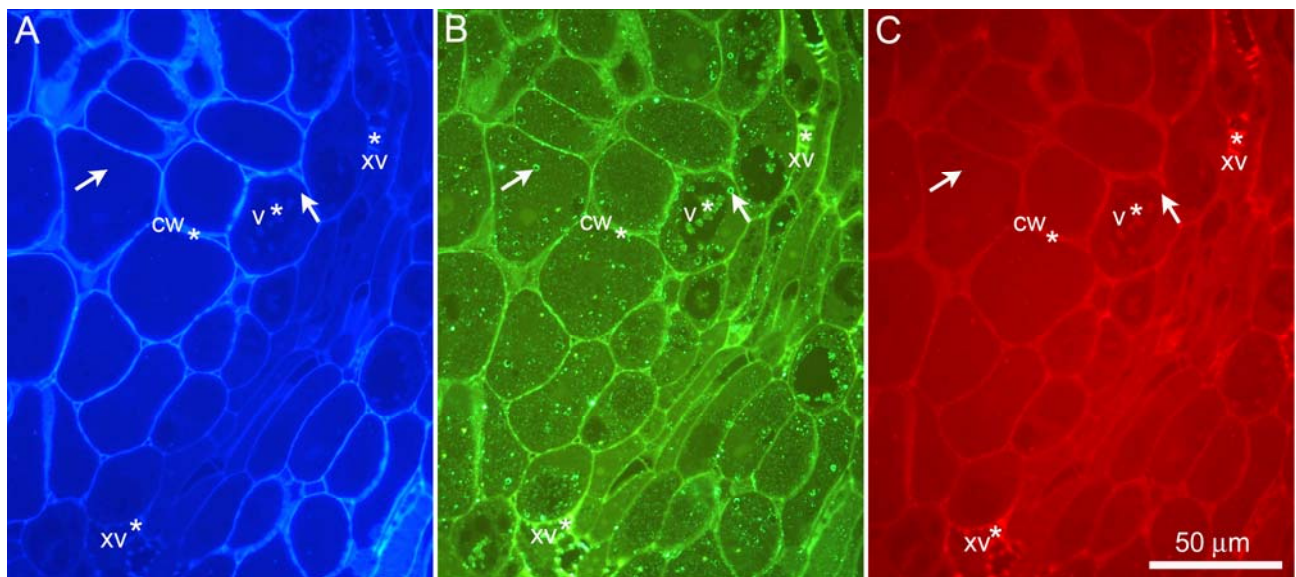

**Fig. S8.** Autofluorescence control on sections from barley embryos 24 hai  
immuno-labelled with the antibody to the protease HvPap-1 and revealed with  
Alexa Fluor 488. **A**, section examined under UV light (filter set ex BP 365, FT  
395, em LP 397). **B**, the same section as in A under blue light (filter set ex 450-  
490, FT 510, em LP 520). **C**, the same section as in A and B under green light  
(filter set ex BP 546, FT 580, em LP 590). The precise sub-cellular localization of  
the protease HvPap-1 was identified in abundant bright foci dispersed in the  
cytoplasm and round-shaped structures (arrows). Other green-fluorescent  
components (asterisks) in the cell walls (cw), xylem vessels (xv) and vacuolar  
deposits (v) corresponded to autofluorescence background, since these  
structures were also seen under UV and green light excitations.
